# Supplementary material
Source: PubMed Central journal article supplement (PMC4902176)
Supplement: NIHMS787250-supplement-Author_approval_statement_7.pdf [file NIHMS787250-supplement-Author_approval_statement_7.pdf]

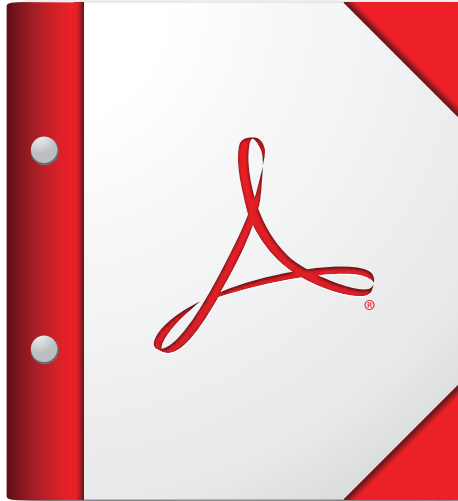

**For the best experience, open this PDF portfolio in  
Acrobat X or Adobe Reader X, or later.**

**Get Adobe Reader Now!**
