# Supplementary material
Source: PubMed Central journal article supplement (PMC4902176)
Supplement: NIHMS787250-supplement-Supplemental_Material.pdf [file NIHMS787250-supplement-Supplemental_Material.pdf]

## SUPPLEMENTAL TABLES AND FIGURES.

### SUPPLEMENT TABLE 1. CONVENTIONAL 2D MEASURES OF LINEAR RIGHT VENTRICULAR DIMENSION

| Parameter                           | Scleroderma<br>N=138 | Controls<br>N=40 | p-value           | Normal<br>Values  |
|-------------------------------------|----------------------|------------------|-------------------|-------------------|
| <b>Conventional 2D Measures</b>     |                      |                  |                   |                   |
| RA Area (cm <sup>2</sup> )          | 14.7 ± 3.7           | 13.0 ± 2.7       | <b>0.01</b>       | >18 <sup>1</sup>  |
| RV Internal Dimension Diastole (cm) | 3.10 ± 0.49          | 2.75 ± 0.21      | <b>&lt;0.0001</b> | <3.5 <sup>1</sup> |
| RV Base (cm)                        | 3.57 ± 0.64          | 3.26 ± 0.42      | <b>0.005</b>      | >4.2 <sup>1</sup> |
| RV Length (cm)                      | 7.70 ± 0.93          | 7.17 ± 0.62      | <b>0.0009</b>     | >8.6 <sup>1</sup> |
| RV Outflow Tract (cm)               | 2.44 ± 0.42          | 2.11 ± 0.34      | <b>&lt;0.0001</b> | >2.6 <sup>1</sup> |

**Supplement Table 1:** Conventional 2D echocardiographic measures of linear right ventricular dimension between systemic sclerosis patients and non-SSc controls. Normal values based on ASE Guidelines<sup>1</sup> are provided to distinguish between statistically significant and clinically significant differences.

**SUPPLEMENTAL FIGURE 1. FRACTIONAL AREA CHANGE IN SYSTEMIC SCLEROSIS VERSUS NORMAL CONTROLS.**

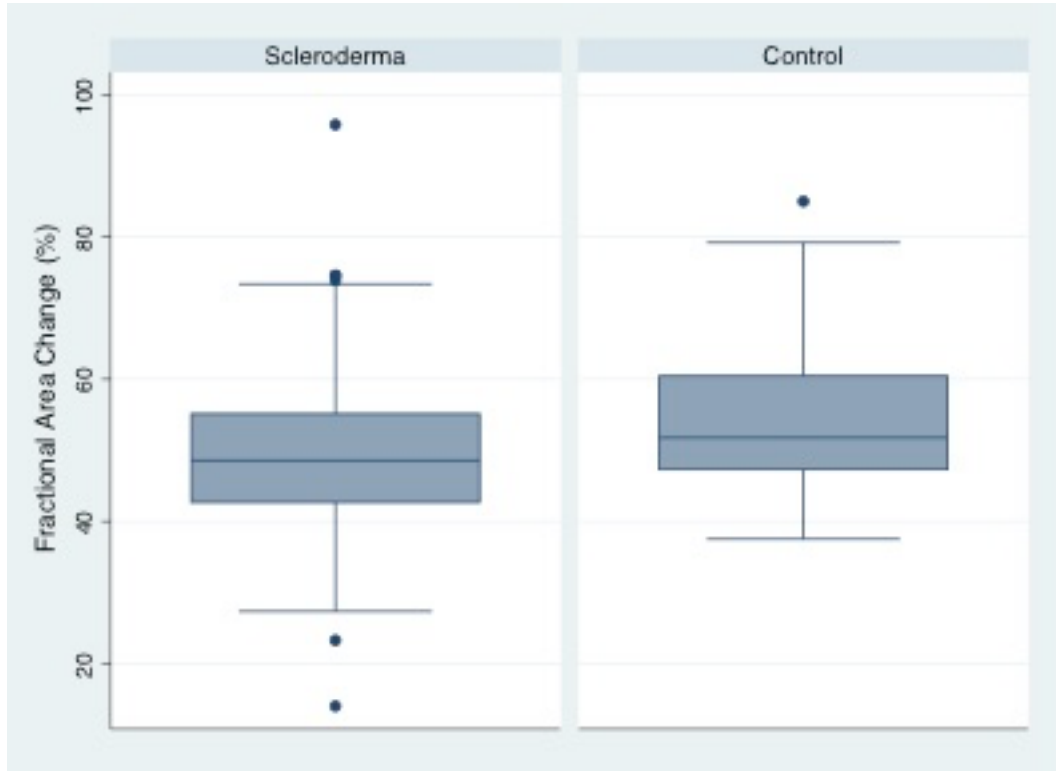

**Supplement Figure 1:** Similar distributions of fractional area change (FAC) are shown between SSc patients and controls. While RV FAC (%) was statistically different between the two groups ( $p=0.002$ ), values were within normal clinical limits for both SSc and controls ( $48.9 \pm 10.9$  versus  $55 \pm 10.7$ ).

**SUPPLEMENTAL FIGURE 2. TAPSE IN SYSTEMIC SCLEROSIS VERSUS NORMAL CONTROLS.**

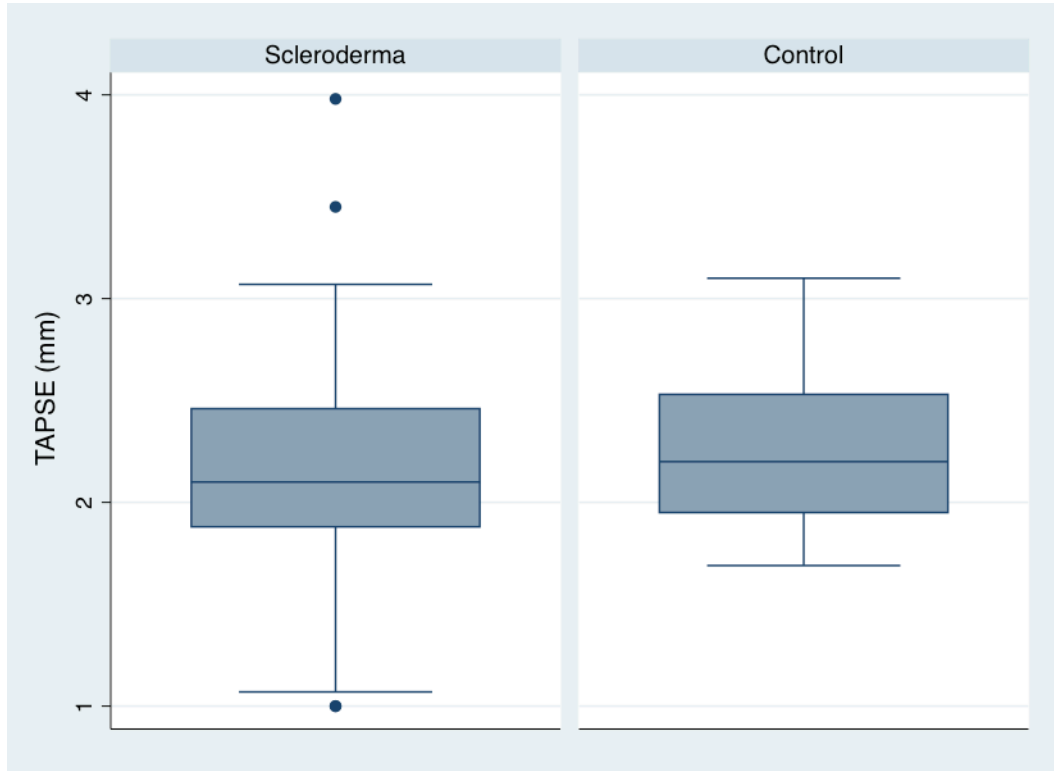

**Supplement Figure 2:** Similar distributions of tricuspid annular plane systolic excursion (TAPSE) are shown between SSc patients and controls. On average, TAPSE was within normal clinical limits between SSc and controls, and did not differ between groups ( $2.16 \pm 0.47$  versus  $2.25 \pm 0.40$ ,  $P=0.307$ ).

**SUPPLEMENTAL REFERENCES.**

1. Rudski LG, Lai WW, Afilalo J, Hua L, Handschumacher MD, Chandrasekaran K, Solomon SD, Louie EK, Schiller NB. Guidelines for the echocardiographic assessment of the right heart in adults: A report from the American Society of Echocardiography. *Journal of the American Society of Echocardiography*. 2010; 23: 686-713.
